# Supplementary material for: Surface reconstruction layer boosting interfacial stability of LiCoO2/Li6PS5Cl in bulk all-solid-state Li batteries
Source: Royal Society of Chemistry journal article supplement (doi:10.1039/d3ta07630j), 2024-01-01
Supplement: d3ta07630j1.pdf [file d3ta07630j1.pdf]

## Electronic Supplementary Information (ESI)

### Surface Reconstruction Layer Boosting Interfacial Stability of $\text{LiCoO}_2/\text{Li}_6\text{PS}_5\text{Cl}$ in Bulk All-Solid-State Li Batteries

Shiliang Zheng,<sup>a,†</sup> Zengzhu Li,<sup>a,†</sup> Zhiwe He,<sup>a,†</sup> Wenguang Zhao,<sup>b,†</sup> Chenyu Liu,<sup>a,\*</sup> Zhan Lin,<sup>a</sup> Zengqing Zhuo<sup>c,\*</sup> and Bingkai Zhang<sup>a,\*</sup>

<sup>a</sup> Guangdong Provincial Key Laboratory of Plant Resources Biorefinery, School of Chemical

Engineering and Light Industry, Guangdong University of Technology, Guangzhou 510006, China.

<sup>b</sup> School of Advanced Materials, Peking University, Shenzhen Graduate School, Shenzhen, China.

<sup>c</sup> Advanced Light Source, Lawrence Berkeley National Laboratory, Berkeley, CA, 94720, USA.

† All authors contributed equally.

E-mail addresses: [liucy@gdut.edu.cn](mailto:liucy@gdut.edu.cn); [zhuozhuo@lbl.gov](mailto:zhuozhuo@lbl.gov); [zhangbk@gdut.edu.cn](mailto:zhangbk@gdut.edu.cn)

## **Experimental details**

### ***Preparation of the Materials***

Xiamen Tungsten Co., Ltd (XTC) supplied the monocrystal  $\text{LiCoO}_2$ . Indium foils (0.05 mm in thickness) were purchased from Tengfeng Metal Materials Technology Co., Ltd. Solid electrolytes ( $\text{Li}_6\text{PS}_5\text{Cl}$  (LPSCl)) were purchased from Hefei Kejing Materials Technology Co., Ltd. The reducing gas ( $\text{CH}_4$ ) was purchased from Guangzhou Danoutong Trading Co., Ltd. Lithium (99.99% purity, 50 mm in thickness) was brought from China Energy Lithium Co., Ltd.

### ***Preparation of SR( $\text{CH}_4$ )-LCO***

The treatment of P-LCO is carried out in a quartz tube furnace. A multi-step thermal method was used to precisely regulate the SRL layer over LCO. The  $\text{N}_2$  flux was used as a protective gas during the temperature increase. When the temperature reached  $650\text{ }^\circ\text{C}$  ( $5^\circ\text{C}/\text{min}$ ), the gas was converted to  $\text{CH}_4$ , and the reduction reaction between  $\text{CH}_4$  and LCO was initiated. Following the chilling process, the gas is converted to  $\text{N}_2$  protection gas until it reaches room temperature. By adjusting the sintering time, a series of SR-LCO oxides (designated as SR-LCO-X min, where X = 5 and 10 minutes) with various GSIRR reaction times with  $\text{CH}_4$  gas were produced.

### ***Electrochemical tests***

Using the battery testing system (LAND, Wuhan) at room temperature ( $25\text{ }^\circ\text{C}$ ), the galvanostatic discharge/charge tests of ASSLBs with LCO cathodes were carried out at a potential range of 2.6-4.3 V vs.  $\text{Li}^+/\text{Li}$ , where 1C was defined as  $120\text{ mA g}^{-1}$ . For high voltage test conditions, a potential range of 2.6-4.5 V (or 2.6-4.6 V) vs.  $\text{Li}^+/\text{Li}$  was applied, and 1C was defined as  $120\text{ mA g}^{-1}$ . The GITT curves of ASSLBs were performed with a 20-minute discharge at 0.1C followed by a 2-hour relaxation. Electrochemical impedance spectroscopy (EIS) of ASSLBs was carried out at the Autolab working station (Wantong, Switzerland) with a frequency range of 3500 Hz to 0.01 Hz and an AC

perturbation signal of 5 mV.

### ***Materials characterization***

Powder X-ray diffraction (XRD) was performed using a Rigaku Ultima IV with a Cu K radiation source and samples were scanned at a  $2\theta$  range of 5 to  $90^\circ$  at a scan speed of  $1^\circ \text{ min}^{-1}$ . Use a scanning electron microscope (SEM, TESCAN MIRA4) to observe the morphology of cathodes before and after reduction. A high-resolution transmission electron microscope (HRTEM) was used to study the  $\text{CoO}/\text{Li}_2\text{CO}_3$  SRL layer on the surface of LCO at an accelerating voltage of roughly 200 kV. Before TEM observation, thin sections of the  $\text{SR}(\text{CH}_4)\text{-LCO-5min}$  particles were prepared using the Focused Ion Beam (FIB) technique. Surface components of samples were analyzed using a PHI-5000versaprobeIII electron spectrometer (X-ray photoelectron spectroscopy, XPS), and the binding energies reported herein were corrected for the C-C/C-H signal at 284.8 eV. As an X-ray source,  $\text{Al K}\alpha$  monochromatized radiation ( $h\nu = 1486.6 \text{ eV}$ ) was used. The surface of the specimen is sputtered by inert gas ion bombardment with a sputter rate of 15 nm ( $\text{SiO}_2$  as standard reference) for each time, and spectra are then collected from the center of an etched area.

## Supplementary figures

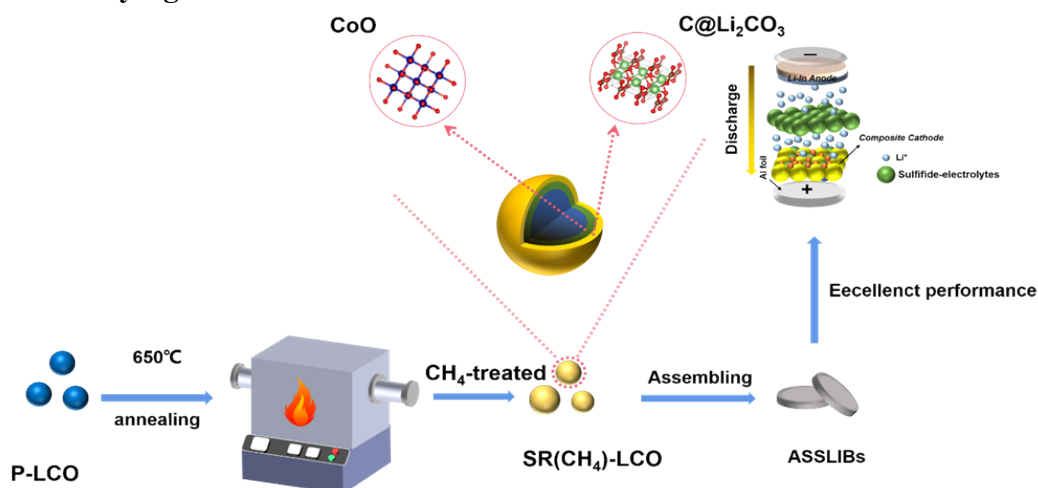

**Figure S1** A schematic illustration showing the GSIRR process and the formation of CoO/Li<sub>2</sub>CO<sub>3</sub> layer on the surface of the particle.

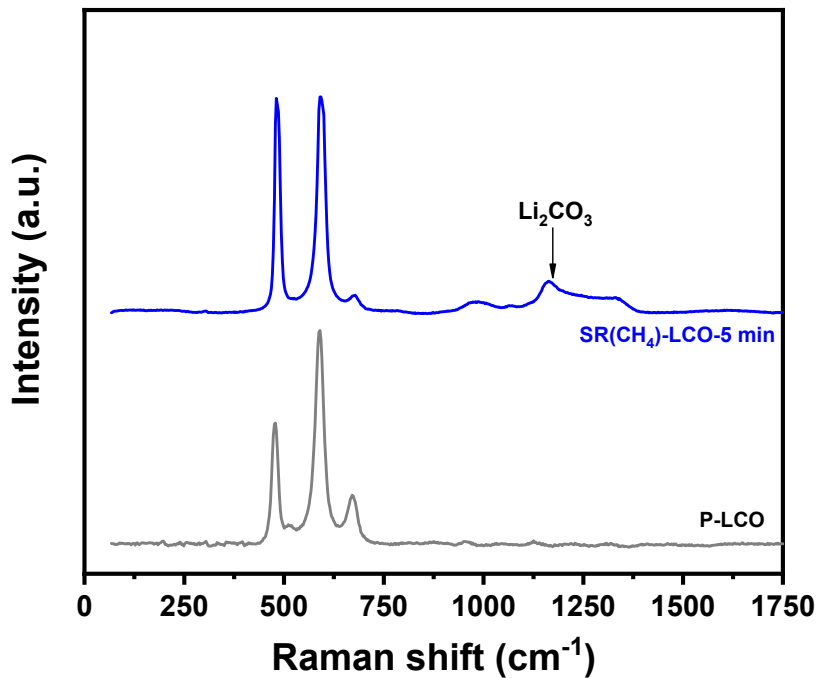

**Figure S2** Raman analysis of SR(CH<sub>4</sub>)-LCO-5min and P-LCO. The blue trace represents SR(CH<sub>4</sub>)-LCO-5min sample. The grey trace represents P-LCO sample.

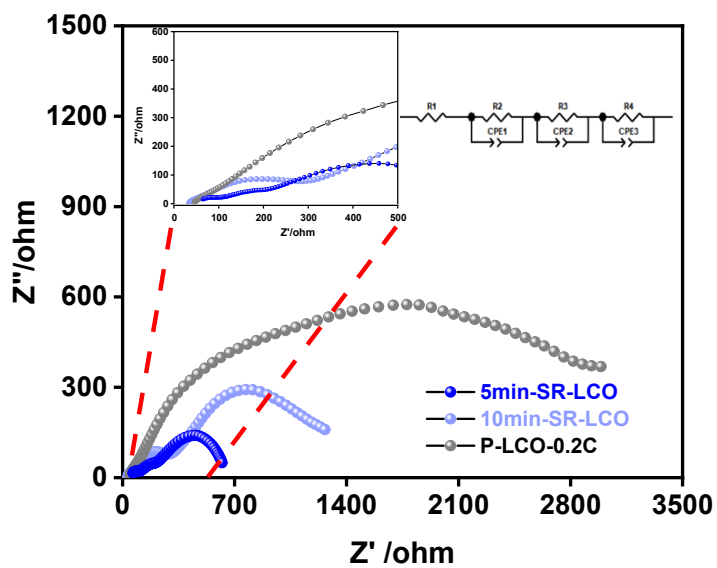

**Figure S3** The Nyquist plots of P-LCO, SR(CH<sub>4</sub>)-5 min LCO and SR(CH<sub>4</sub>)-10 min LCO all-solid-state lithium-ion batteries after 10 cycles at 0.2 C.

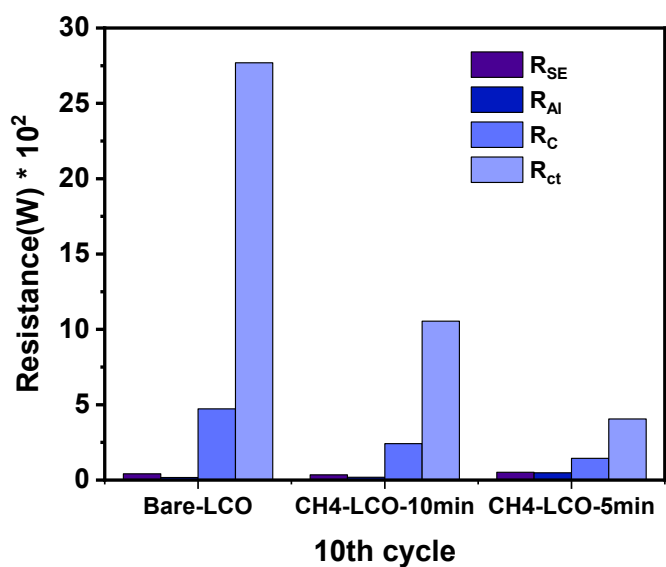

**Figure S4** The fitting results of Nyquist plots for batteries.

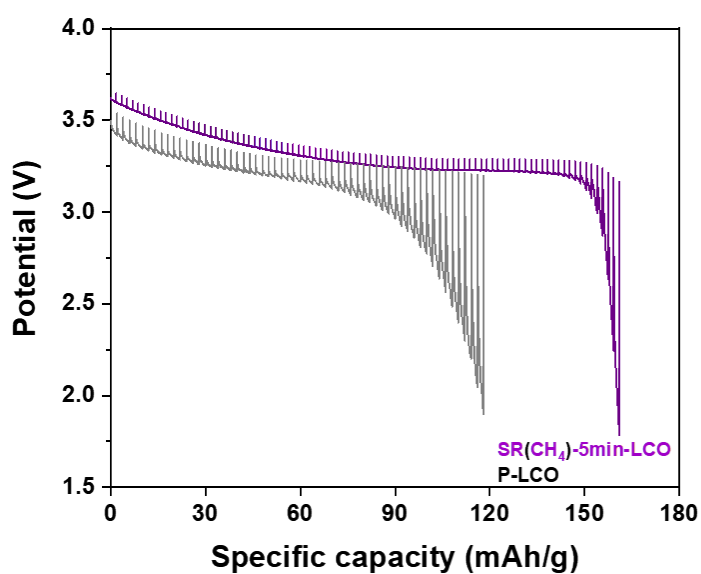

Figure S5 GITT discharge curves of P-LCO and SR(CH<sub>4</sub>)-LCO-5 min.

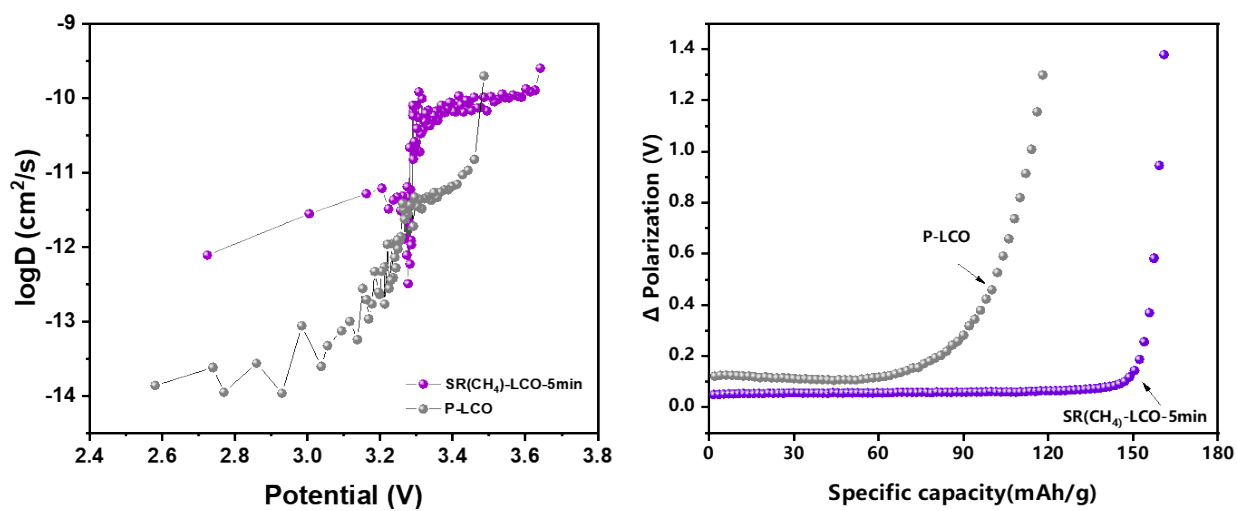

Figure S6 Ion diffusion coefficient log D and Polarization curves of SR(CH<sub>4</sub>)-LCO-5 min and P-LCO.

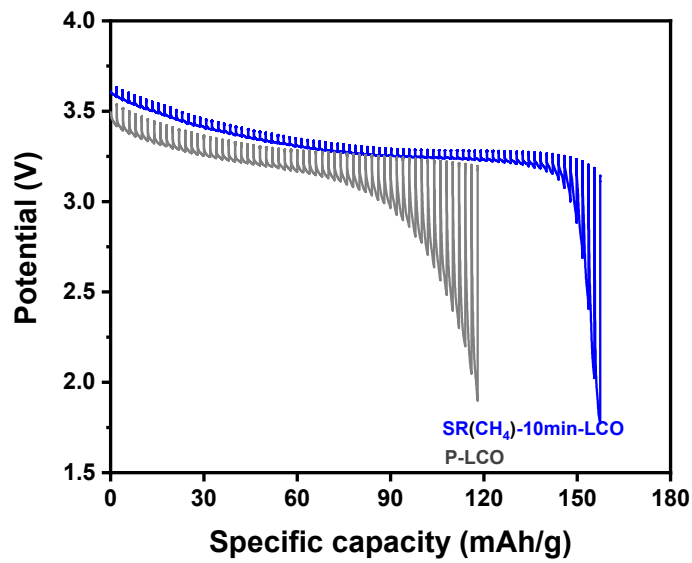

Figure S7 GITT discharge curves of P-LCO and SR(CH<sub>4</sub>)-LCO-10 min.

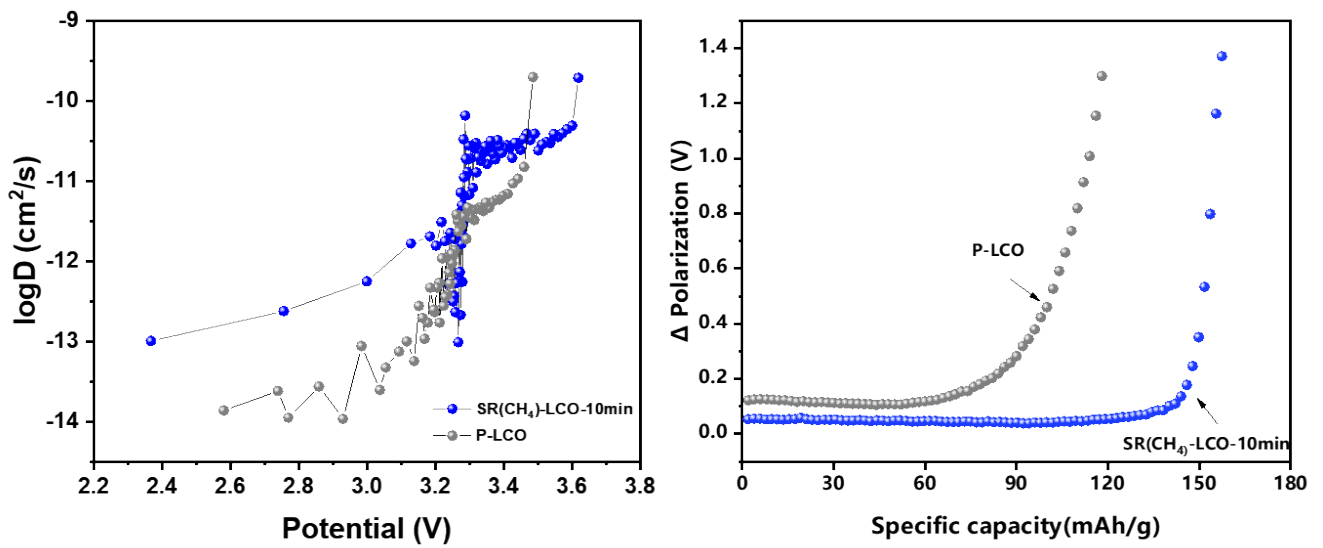

Figure S8 Ion diffusion coefficient log D and Polarization curves of SR(CH<sub>4</sub>)-LCO-10 min and P-LCO.

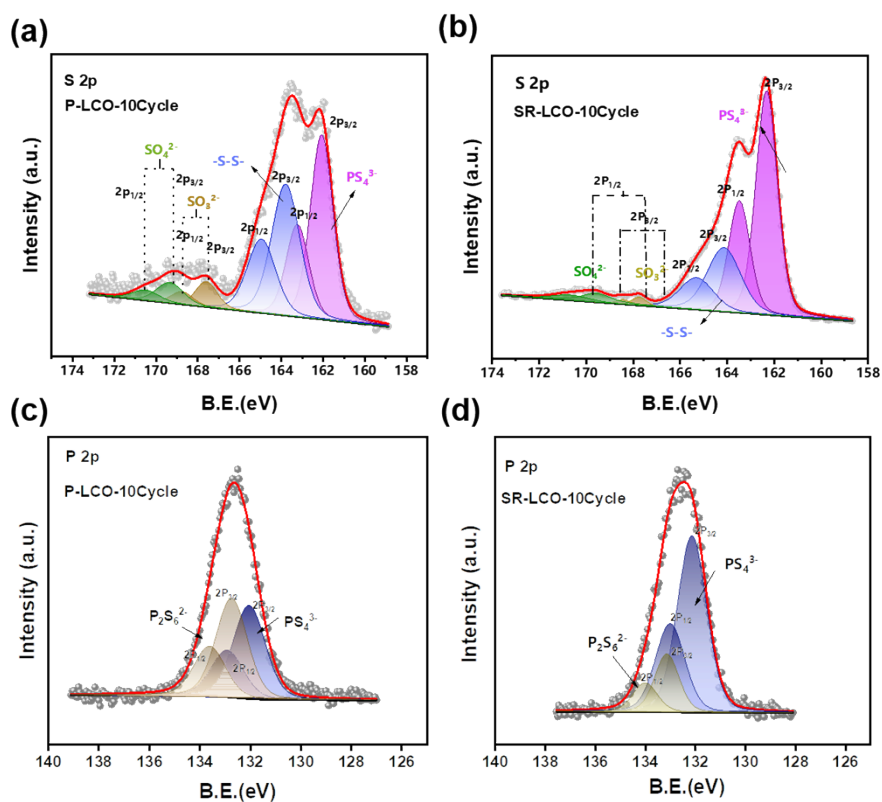

**Figure S9** XPS spectra for P-LCO and SR-LCO. (a-b) S  $2p$  and (c-d) P  $2p$  XPS spectra of P-LCO/LPSCl interface and SR-LCO-5min/LPSCl interface after 10 cycles at 0.2C.

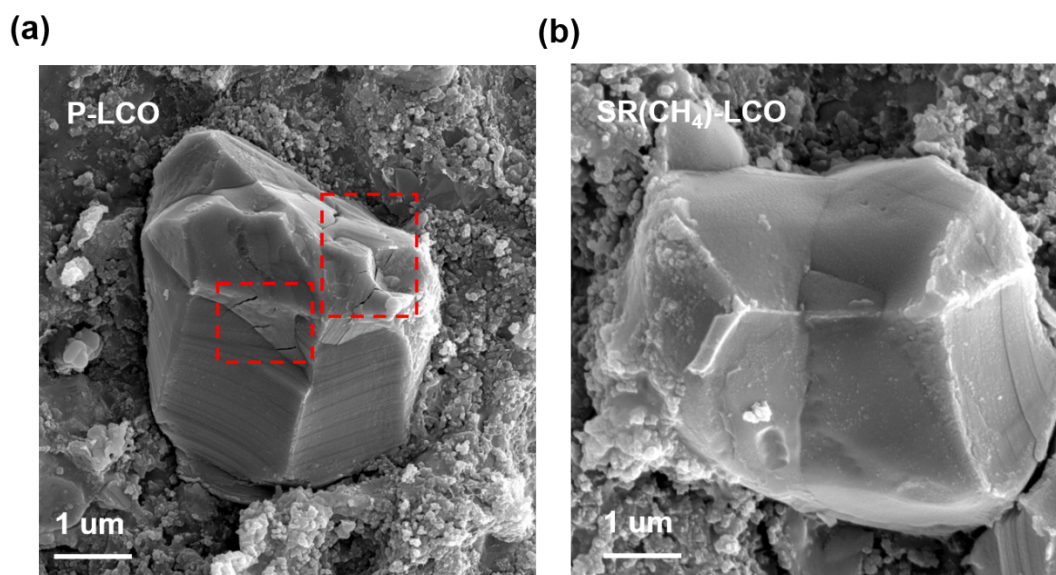

**Figure S10** (a-b) The SEM images of P-LCO and SR(CH<sub>4</sub>)-LCO after 10 cycles at 0.2C.



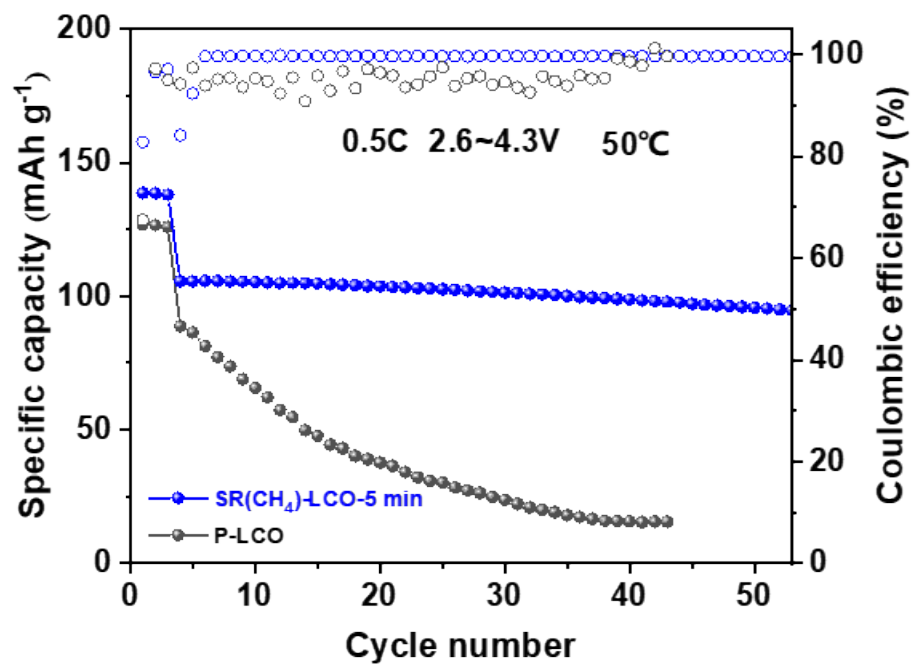

**Figure S11** The performance of ASSEBs with SR(CH<sub>4</sub>)-LCO-5min and P-LCO at 0.5 C under 50°C.

**Table S1** Detailed comparison of the electrochemical performance of different coating in ASSLBs.

|      | Design in ASSLBs                                                    | T (°C) | Voltage Range (V) | Rate  | Initial discharge capacity (mAh g <sup>-1</sup> ) | Capacity retention (%) | Cycles |
|------|---------------------------------------------------------------------|--------|-------------------|-------|---------------------------------------------------|------------------------|--------|
| This | CH <sub>4</sub> -LCO-5min LPSCl In-Li                               | 25     | 2.6-4.5           | 0.5C  | 149.8                                             | 89.38                  | 200    |
| work | CH <sub>4</sub> -LCO-5min LPSCl In-Li                               | 25     | 2.6-4.6           | 0.5C  | 168.6                                             | 82.68                  | 158    |
| 1    | LiNbO <sub>3</sub> @LCO LGPS In-Li                                  | 25     | 2.5-4.2           | 1C    | 115                                               | 81.73                  | 50     |
| 2    | Al <sub>2</sub> O <sub>3</sub> /LiAlO <sub>2</sub> @NCM LPSCl In-Li | 25     | 2.6-4.3           | 0.25C | 138.9                                             | 54                     | 100    |
| 3    | Li <sub>3</sub> BO <sub>3</sub> @LCO LLZTO Li                       | 25     | 2.7-4.2           | 0.05C | 136                                               | 76                     | 100    |
| 4    | Li <sub>2</sub> CoTi <sub>3</sub> O <sub>8</sub> @LCO LGPS In-Li    | 30     | 2.1-4.5           | 0.2C  | 180                                               | 73.3                   | 100    |
| 5    | LNO@NCM811 LPSCl In-Li                                              | 30     | 2.7-4.38          | 0.5C  | 162                                               | 77.9                   | 50     |

## References

1. X. Sun, Y. Yamada, S. Hori, Y. Li, K. Suzuki, M. Hirayama and R. Kanno, *J. Mater. Chem. A*, 2021, 9, 17905–17912.
2. R. S. Negi, Y. Yusim, R. Pan, S. Ahmed, K. Volz, R. Takata, F. Schmidt, A. Henss and M. T. Elm, *Adv Materials Inter*, 2022, 9, 2101428.
3. Y. Zhang, Z. Tang, Y. Mei, Y. Xiao, X. Xiang, D. Luo and J. Deng, *Applied Surface Science*, 2023, 630, 157488.
4. C.-W. Wang, F.-C. Ren, Y. Zhou, P.-F. Yan, X.-D. Zhou, S.-J. Zhang, W. Liu, W.-D. Zhang, M.-H. Zou, L.-Y. Zeng, X.-Y. Yao, L. Huang, J.-T. Li and S.-G. Sun, *Energy Environ. Sci.*, 2021, 14, 437–450.
5. X. Li, Q. Sun, Z. Wang, D. Song, H. Zhang, X. Shi, C. Li, L. Zhang and L. Zhu, *Journal of Power Sources*, 2020, 456, 227997.
